# Supplementary material for: Public-Academic Partnerships: A Public-Academic Partnership to Support a State Mental Health Authority's Strategic Planning and Policy Decisions
Source: Atypon-hosted journal article supplement (doi:10.1176/appi.ps.014132011), 2011-12-01
Supplement: pss6212_1413_ds.pdf [file pss6212_1413_ds.pdf]

**For online supplement**

**PARTICIPANTS IN THE MULTI-STAKEHOLDER ADVISORY PANEL**

**MEETING HOSTS:**

**Susan M. Essock, Ph.D.**

Professor  
Department of Psychiatry  
College of Physicians and Surgeons  
Columbia University  
Director, Division of Mental Health Services and  
Policy Research  
New York State Psychiatric Institute

**TOPIC AREA EXPERTS:**

**Wendy Brennan**

Executive Director  
NAMI-NYC Metro  
New York, NY

**Lisa Dixon, M.D., M.P.H.**

Professor  
University of Maryland School of Medicine  
Director, Division of Health Services Research  
Associate Director of Research  
VA Capitol Health Care Network MIRECC  
Baltimore, MD

**Dennis G. Dyck, Ph.D.**

Professor of Psychology and Neurosciences  
Vice Chancellor for Research  
Washington State University  
Spokane, WA

**Shirley M. Glynn, Ph.D.**

Clinical Research Psychologist  
VA Greater Los Angeles Healthcare System at  
West Los Angeles  
Research Psychologist  
Semel Institute of Neuroscience  
UCLA  
Los Angeles, CA

**Alicia Lucksted, Ph.D.**

Assistant Professor  
Department of Psychiatry  
Division of Services Research  
School of Medicine  
University of Maryland

**Eddie Mannion**

Director, Training and Education Center (TEC)  
Mental Health Association of Southeastern  
Pennsylvania  
Philadelphia, PA

**Mary McKay, Ph.D**

Professor of Psychiatry and Community Medicine  
Mount Sinai School of Medicine  
New York, NY

**Susan A. Pickett-Schenk**

Associate Professor  
Department of Psychiatry  
Center on Mental Health Services Research and  
Policy  
University of Illinois at Chicago

---

**ADDITIONAL PARTICIPANTS**

**Sharon Aungst, M.S.**

Division of Mental Health Services and Policy  
Research New York State Psychiatric Institute  
New York, NY

**Peter Boutros, Ph.D Candidate, LMHC, CASAC**

ACT Team Leader  
Services for the Underserved  
New York, NY

**Tahleah R Chappel, B.A.**

Health Project Coordinator  
Department of Psychiatry  
University of Rochester  
Rochester, NY

**Beth G. Hoh, LCSW-R**

Senior Health Project Coordinator  
Department of Psychiatry  
University of Rochester

**Thomas Jewell, Ph.D.**

Director of Evaluation and Services Research  
Coordinated Care Services Incorporated  
Rochester, NY

**John Johnson, M.A., LCSW-R**

Creedmor Psychiatric Center  
Queens, NY

**Doris Joy, R.N., LCSW-R**

South Beach Psychiatric Center  
Staten Island, New York

**J. Steven Lamberti, M.D.**

Associate Professor of Psychiatry  
Associate Chair for Clinical Programs  
Director, Long Term Care Program  
Department of Psychiatry  
University of Rochester Medical Center  
Department of Psychiatry

**Luis O. Lopez, M.S.**

QA/ Staff Development and Education  
Services for the Underserved  
New York, NY

**Paul Margolies, Ph.D.**

Associate Director,  
Center for Practice Innovations  
At Columbia psychiatry  
New York State Psychiatric Institute  
New York, NY

**Gregory Miller, M.D.**

Medical Director, Adult Services  
New York State Office of Mental Health  
44 Holland Avenue  
Albany, NY

**Robert Myers**

Sr. Deputy Commissioner, Director, Division of  
Adult Services  
New York State Office of Mental Health

**Ilana Nossel, M.D.**

Department of Psychiatry  
College of Physicians and Surgeons  
Columbia University  
Research Scientist, Division of Mental Health  
Services and Policy Research  
New York State Psychiatric Institute

**Vicki O'Brien**

Intensive Outpatient Program Director  
Occupations, Inc.  
Middletown, NY

**Thomas O'Clair**

Recipient Affairs Specialist, Family Issues  
New York State Office of Mental Health  
Albany, NY

**Anthony Salerno, Ph.D.**

Assistant Clinical Professor in Medical Psychology  
(Psychiatry)  
College of Physicians and Surgeons  
Columbia University  
Division of Mental Health Services and Policy  
Research  
New York State Psychiatric Institute  
New York, NY

**Catherine Sellars, LCSW**

Team Leader Union Center PROS and PHP  
Occupations Inc.  
Middletown, NY

**Anne Smith, LMSW**

Executive Director  
Family Institute for Education, Practice & Research  
Rochester, NY

**Herbert M. Weis, Ph.D.**

Executive Administrator of Quality Improvement  
The Horizon Corporations  
Buffalo, NY

**Amanda Wenner, M.A., LMHC**

Program Director of Transitions Counseling Center  
Horizon Health Services  
Buffalo, NY
